# Supplementary material
Source: PubMed Central journal article supplement (PMC4521425)
Supplement: supp_32.1.18_BRIDGES_1S_TABLE_FF.pdf [file supp_32.1.18_BRIDGES_1S_TABLE_FF.pdf]

| Supplemental Table 1S. Self-Assessment Responses by PI Completers and Non-Completers          |                                         |                                         |          |
|-----------------------------------------------------------------------------------------------|-----------------------------------------|-----------------------------------------|----------|
|                                                                                               | PI Completers<br>(total <i>n</i> = 150) | Non-Completers<br>(total <i>n</i> = 71) | <i>P</i> |
| Degree (%)                                                                                    | ( <i>n</i> = 150)                       | ( <i>n</i> = 71)                        |          |
| DO                                                                                            | 9                                       | 9                                       | 0.928    |
| MD                                                                                            | 69                                      | 70                                      |          |
| NP                                                                                            | 14                                      | 16                                      |          |
| PA                                                                                            | 8                                       | 6                                       |          |
| Specialty (%)                                                                                 | ( <i>n</i> = 150)                       | ( <i>n</i> = 71)                        |          |
| Diabetes                                                                                      | 3                                       | 6                                       | 0.831†   |
| Endocrinology                                                                                 | 7                                       | 4                                       |          |
| Family practice                                                                               | 33                                      | 35                                      |          |
| General practice                                                                              | 3                                       | 4                                       |          |
| Internal medicine                                                                             | 45                                      | 42                                      |          |
| Other*                                                                                        | 9                                       | 8                                       |          |
| Primary practice type (%)                                                                     | ( <i>n</i> = 150)                       | ( <i>n</i> = 71)                        |          |
| Solo practice                                                                                 | 27                                      | 35                                      | 0.535†   |
| Group practice < 5                                                                            | 27                                      | 25                                      |          |
| Group practice > 5                                                                            | 21                                      | 17                                      |          |
| Institutionally salaried (hospital/clinic)                                                    | 21                                      | 16                                      |          |
| Institutionally salaried (health maintenance organization/<br>managed care/insurance company) | 1                                       | 0                                       |          |
| Other (please specify)                                                                        | 4                                       | 7                                       |          |
| Years in practice (%)                                                                         | ( <i>n</i> = 150)                       | ( <i>n</i> = 71)                        |          |
| < 1                                                                                           | 1                                       | 0                                       | 0.450†   |
| 1–10                                                                                          | 39                                      | 28                                      |          |
| 11–20                                                                                         | 32                                      | 41                                      |          |
| 21–30                                                                                         | 19                                      | 21                                      |          |
| > 30                                                                                          | 9                                       | 10                                      |          |
| Patients with diabetes seen each week                                                         | ( <i>n</i> = 150)                       | ( <i>n</i> = 71)                        |          |
| Mean number of patients                                                                       | 23                                      | 27                                      | 0.210    |
| Having a dedicated individual for diabetes education within the<br>office (%)                 | ( <i>n</i> = 150)                       | ( <i>n</i> = 71)                        |          |
| Yes                                                                                           | 47                                      | 39                                      | 0.270    |

*continued on p. 2*

**Supplemental Table 1S. Self-Assessment Responses by PI Completers and Non-Completers, *continued***

|                                                                                                                                          | <b>PI Completers<br/>(total n = 150)</b> | <b>Non-Completers<br/>(total n = 71)</b> | <b>P</b> |
|------------------------------------------------------------------------------------------------------------------------------------------|------------------------------------------|------------------------------------------|----------|
| Frequency of discussion of diet and exercise plans with measurable goals (%)                                                             | (n = 150)                                | (n = 71)                                 |          |
| Never                                                                                                                                    | 1                                        | 0                                        | 0.558†   |
| Sometimes                                                                                                                                | 13                                       | 14                                       |          |
| Frequently                                                                                                                               | 47                                       | 38                                       |          |
| Always                                                                                                                                   | 40                                       | 48                                       |          |
| Frequency of documentation of discussions about diet and exercise in the patient chart (%)                                               | (n = 149)                                | (n = 71)                                 |          |
| Never                                                                                                                                    | 1                                        | 0                                        | 0.463†   |
| Sometimes                                                                                                                                | 28                                       | 32                                       |          |
| Frequently                                                                                                                               | 42                                       | 32                                       |          |
| Always                                                                                                                                   | 30                                       | 35                                       |          |
| Frequency of referral of diabetes patients to a certified diabetes educator or recognized disease-state-management education program (%) | (n = 150)                                | (n = 71)                                 |          |
| Never                                                                                                                                    | 3                                        | 9                                        | 0.179†   |
| Sometimes                                                                                                                                | 48                                       | 35                                       |          |
| Frequently                                                                                                                               | 35                                       | 41                                       |          |
| Always                                                                                                                                   | 14                                       | 16                                       |          |
| Frequency of documentation of these referrals in the patient chart (%)                                                                   | (n = 145)                                | (n = 65)                                 |          |
| Never                                                                                                                                    | 3                                        | 0                                        | 0.109†   |
| Sometimes                                                                                                                                | 19                                       | 9                                        |          |
| Frequently                                                                                                                               | 20                                       | 29                                       |          |
| Always                                                                                                                                   | 59                                       | 62                                       |          |
| Frequency of specific action taken when your diabetes patients are not at blood pressure or lipid goals (%)                              | (n = 150)                                | (n = 71)                                 |          |
| Never                                                                                                                                    | 0                                        | 0                                        | 0.376†   |
| Sometimes                                                                                                                                | 6                                        | 3                                        |          |
| Frequently                                                                                                                               | 43                                       | 38                                       |          |
| Always                                                                                                                                   | 51                                       | 59                                       |          |

*continued on p. 3*

**Supplemental Table 1S. Self-Assessment Responses by PI Completers and Non-Completers, *continued***

|                                                                                                                                                                 | <b>PI Completers<br/>(total n = 150)</b> | <b>Non-Completers<br/>(total n = 71)</b> | <b>P</b> |
|-----------------------------------------------------------------------------------------------------------------------------------------------------------------|------------------------------------------|------------------------------------------|----------|
| Frequency of documentation of these actions in the patient chart (%)                                                                                            | (n = 150)                                | (n = 71)                                 |          |
| Never                                                                                                                                                           | 0                                        | 0                                        | 0.336†   |
| Sometimes                                                                                                                                                       | 6                                        | 3                                        |          |
| Frequently                                                                                                                                                      | 31                                       | 25                                       |          |
| Always                                                                                                                                                          | 63                                       | 72                                       |          |
| Percentage of patients with type 2 diabetes who receive a comprehensive foot exam, including neurologic and vascular testing, at least once every 12 months (%) | (n = 150)                                | (n = 71)                                 |          |
| < 10%                                                                                                                                                           | 5                                        | 9                                        | 0.532†   |
| 10–25%                                                                                                                                                          | 8                                        | 7                                        |          |
| 26–50%                                                                                                                                                          | 11                                       | 17                                       |          |
| 51–75%                                                                                                                                                          | 19                                       | 20                                       |          |
| 76–90%                                                                                                                                                          | 21                                       | 13                                       |          |
| > 90%                                                                                                                                                           | 37                                       | 35                                       |          |
| Frequency of foot exam results documented in the medical chart (%)                                                                                              | (n = 150)                                | (n = 71)                                 |          |
| Never                                                                                                                                                           | 1                                        | 6                                        | 0.226†   |
| Sometimes                                                                                                                                                       | 17                                       | 16                                       |          |
| Frequently                                                                                                                                                      | 29                                       | 34                                       |          |
| Always                                                                                                                                                          | 53                                       | 45                                       |          |
| Percentage of your type 2 diabetes patients at goal who have A1C values measured at least once every 6 months (%)                                               | (n = 150)                                | (n = 71)                                 |          |
| < 10%                                                                                                                                                           | 1                                        | 0                                        | 0.912†   |
| 10–25%                                                                                                                                                          | 2                                        | 1                                        |          |
| 26–50%                                                                                                                                                          | 1                                        | 3                                        |          |
| 51–75%                                                                                                                                                          | 11                                       | 13                                       |          |
| 76–90%                                                                                                                                                          | 21                                       | 24                                       |          |
| > 90%                                                                                                                                                           | 63                                       | 59                                       |          |

*continued on p. 4*

**Supplemental Table 1S. Self-Assessment Responses by PI Completers and Non-Completers, *continued***

|                                                                                                                                                                                                                                                                                                                                                                                                                                                                                                                                                                                                     | <b>PI Completers<br/>(total <i>n</i> = 150)</b> | <b>Non-Completers<br/>(total <i>n</i> = 71)</b> | <b><i>P</i></b> |
|-----------------------------------------------------------------------------------------------------------------------------------------------------------------------------------------------------------------------------------------------------------------------------------------------------------------------------------------------------------------------------------------------------------------------------------------------------------------------------------------------------------------------------------------------------------------------------------------------------|-------------------------------------------------|-------------------------------------------------|-----------------|
| Frequency of specific action taken when diabetes patients are not meeting their A1C goals (%)                                                                                                                                                                                                                                                                                                                                                                                                                                                                                                       | ( <i>n</i> = 150)                               | ( <i>n</i> = 71)                                |                 |
| Never                                                                                                                                                                                                                                                                                                                                                                                                                                                                                                                                                                                               | 0                                               | 0                                               | 0.967†          |
| Sometimes                                                                                                                                                                                                                                                                                                                                                                                                                                                                                                                                                                                           | 4                                               | 4                                               |                 |
| Frequently                                                                                                                                                                                                                                                                                                                                                                                                                                                                                                                                                                                          | 43                                              | 41                                              |                 |
| Always                                                                                                                                                                                                                                                                                                                                                                                                                                                                                                                                                                                              | 53                                              | 55                                              |                 |
| Frequency of documentation of action taken when diabetes patients are not meeting their A1C goals (%)                                                                                                                                                                                                                                                                                                                                                                                                                                                                                               | ( <i>n</i> = 150)                               | ( <i>n</i> = 71)                                |                 |
| Never                                                                                                                                                                                                                                                                                                                                                                                                                                                                                                                                                                                               | 0                                               | 0                                               | 0.634†          |
| Sometimes                                                                                                                                                                                                                                                                                                                                                                                                                                                                                                                                                                                           | 3                                               | 1                                               |                 |
| Frequently                                                                                                                                                                                                                                                                                                                                                                                                                                                                                                                                                                                          | 19                                              | 23                                              |                 |
| Always                                                                                                                                                                                                                                                                                                                                                                                                                                                                                                                                                                                              | 77                                              | 76                                              |                 |
| <p><i>*Includes all specialties for which there was ≤ 1 participant among Partial and Non-Completers or PI Completers. Other specialties include Allergy, Anesthesiology, Cardiovascular Disease, Emergency Medicine, Family Practice/Sports Medicine, Gynecology, IM–Diagnostic Lab Immunology, Infectious Diseases, Internal Medicine–Geriatrics, Internal Medicine–Pediatrics, Neurology, Obstetrics &amp; Gynecology, Other Specialty, Psychiatry, Pulmonary Disease, Sleep Medicine, and Unspecified Specialty.</i></p> <p><i>†More than 10% of cells had expected frequencies &lt; 5.</i></p> |                                                 |                                                 |                 |
